# Supplementary material for: Enhancing extraction efficiency of carpaine in Carica papaya L. leaves: coupling acid-base extraction with surfactant-assisted micro-flotation
Source: Royal Society of Chemistry journal article supplement (doi:10.1039/d4ra05132g), 2024-01-01
Supplement: d4ra05132g1.pdf [file d4ra05132g1.pdf]

The datasets supporting this article have been uploaded as part of the supplementary information

**Supplement information for**

**Enhancing extraction efficiency of basic alkaloid in *Carica Papaya* leaves: coupling acid-base extraction with surfactant-assisted micro-flotation**

**Table S1:** Mann-Whitney U test confirmed the significant differences between foam sample (F) and the controls (C1, C2, C3)

| Sample of comparison | Sample size | p-value (two-tailed) | Significant level ( $\alpha$ ) |
|----------------------|-------------|----------------------|--------------------------------|
| F – C1               | 3-3         | 0.0495               | 0.05                           |
| F – C2               | 3-3         | 0.0495               |                                |
| F – C3               | 3-3         | 0.0495               |                                |

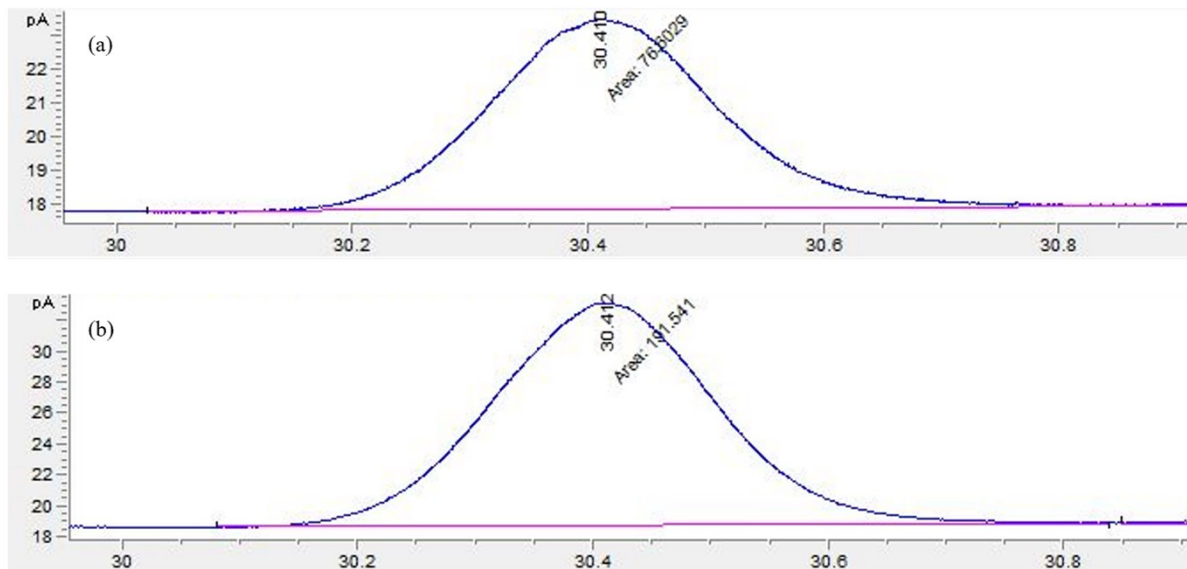

**Figure S1.** GC-FID carpaine characterization. (a) 2% CTAB foam, (b) 2% CTAB foam + standard carpaine
